# Supplementary material for: Effects of Subminimum Inhibitory Concentrations of Antibiotics on the Pasteurella multocida Proteome: A Systems Approach
Source: Comp Funct Genomics. 2008 Apr 22;2008:254836. doi: 10.1155/2008/254836 (PMC2367384; doi:10.1155/2008/254836)
Supplement: Supplementary file 1 — All proteins identified in this study are listed in Supplementary Table 1. Proteins with significant quantitative changes in expression in response to sub-MICs of AMX, CTC, or ENR are listed in Supplementary Table 2. Protein interaction networks built with significant changes in expression with sub-MICs shown in Table 3 are included in the supplementary figure. This figure shows changes in protein expression in response to sub-MICs of AMX, CTC, and ERN. Red and green indicate significant increase and decrease in expression, respectively. Proteins whose expression did not change (pink) and proteins in the network not identified in our datasets (gray) are also included. [file 254836.f1.xls]

## Sheet: supplementary table1
Supplementary table 1.
Accession	Name	Pm70p	AMXp	CTCp	ENRp	Connectivity
15602397*	1-deoxy-D-xylulose-5-phosphate synthase	1	1	0	2	3
15603879*	2~,3~-cyclic nucleotide 2~-phosphodiesterase/3~-nucleotidase bifunctional periplasmic precursor protein	2	10	5	3	8
15602423*	2-dehydro-3-deoxyphosphooctonate aldolase	3	7	2	3	6
15603827*	2-isopropylmalate synthase	0	2	0	1	4
15603250*	3,4-dihydroxy-2-butanone 4-phosphate synthase	1	0	0	0	7
15602666*	30S ribosomal protein S1	88	77	62	47	25
15603281*	30S ribosomal protein S10	32	34	36	23	0
15603257*	30S ribosomal protein S11	7	3	2	3	0
15603219*	30S ribosomal protein S12	13	2	8	5	9
15603258*	30S ribosomal protein S13	7	11	4	6	0
15603267*	30S ribosomal protein S14	1	7	0	0	0
15602166*	30S ribosomal protein S15	65	50	45	41	0
15603880*	30S ribosomal protein S16	33	46	31	29	1
15603271*	30S ribosomal protein S17	30	20	16	8	0
15603043*	30S ribosomal protein S18	1	1	0	2	0
15603276*	30S ribosomal protein S19	8	13	8	9	0
15603849*	30S ribosomal protein S2	18	37	25	28	12
15603524*	30S ribosomal protein S20	6	12	8	8	1
15603104*	30S ribosomal protein S21	4	4	9	4	0
15603274*	30S ribosomal protein S3	17	25	28	20	3
15603256*	30S ribosomal protein S4	7	13	11	9	8
15603263*	30S ribosomal protein S5	19	35	21	19	8
15603045*	30S ribosomal protein S6	43	37	42	32	13
15603220*	30S ribosomal protein S7	18	23	25	26	0
15603266*	30S ribosomal protein S8	33	18	24	23	0
15602428	3-deoxy-7-phosphoheptulonate synthase	0	1	0	0	13
15603170	3-deoxy-D-manno-octulosonic-acid transferase	0	1	1	0	14
15602723*	3-deoxy-manno-octulosonate cytidylyltransferase	4	8	2	0	1
15602349*	3-hydroxydecanoyl-ACP dehydratase	3	1	0	2	4
15603781*	3-ketoacyl-(acyl-carrier-protein) reductase	6	5	5	3	14
15602204*	3-oxoacyl-(acyl carrier protein) synthase	14	15	6	4	24
15603875	4-hydroxy-3-methylbut-2-en-1-yl diphosphate synthase	0	1	0	0	1
15603515	4-hydroxythreonine-4-phosphate dehydrogenase	0	0	0	1	1
15602100*	5,10-methylenetetrahydrofolate reductase	0	4	2	1	17
15602059*	5~-methylthioadenosine/S-adenosylhomocysteine nucleosidase	1	2	0	0	13
15602918	5~-phosphoribosylglycinamide transformylase	0	0	1	0	4
15603607*	50S ribosomal protein L1	36	26	27	34	5
15603604*	50S ribosomal protein L10	10	10	15	21	1
15603608*	50S ribosomal protein L11	4	7	13	4	0
15602385*	50S ribosomal protein L13	70	75	59	48	2
15603270*	50S ribosomal protein L14	8	4	2	3	1
15603261*	50S ribosomal protein L15	3	7	8	6	4
15603273*	50S ribosomal protein L16	9	9	6	1	9
15603254*	50S ribosomal protein L17	1	11	4	4	11
15603264*	50S ribosomal protein L18	5	10	11	4	5
15603163*	50S ribosomal protein L19	6	12	3	1	0
15603277*	50S ribosomal protein L2	41	66	48	43	6
15602469*	50S ribosomal protein L20	3	2	2	1	0
15602212*	50S ribosomal protein L21	23	16	18	26	0
15603275*	50S ribosomal protein L22	23	15	11	14	0
15603278*	50S ribosomal protein L23	13	13	17	9	1
15603269*	50S ribosomal protein L24	58	29	46	31	7
15602504*	50S ribosomal protein L25	8	10	9	4	0
15602213*	50S ribosomal protein L27	4	3	6	3	0
15603016*	50S ribosomal protein L28	19	20	10	11	0
15603272*	50S ribosomal protein L29	13	5	9	7	0
15603280*	50S ribosomal protein L3	23	27	21	25	3
15603262*	50S ribosomal protein L30	71	69	53	58	0
15603007*	50S ribosomal protein L31	2	0	3	2	5
15603777*	50S ribosomal protein L32	19	14	17	12	1
15603015*	50S ribosomal protein L33	3	4	4	3	5
15603027*	50S ribosomal protein L34	0	2	2	0	7
15602468*	50S ribosomal protein L35	0	1	2	0	0
15603279*	50S ribosomal protein L4	28	30	26	18	6
15603268*	50S ribosomal protein L5	3	6	1	6	8
15603265*	50S ribosomal protein L6	16	29	22	13	1
15603603*	50S ribosomal protein L7/L12	117	104	115	117	3
15603042*	50S ribosomal protein L9	39	26	36	39	1
15602285	5-methyltetrahydropteroyltriglutamate--homocysteine methyltransferase	0	1	0	0	1
15601934*	6-phosphofructokinase	4	3	3	2	17
15603419*	6-phosphogluconate dehydrogenase	4	9	2	5	7
15603766*	8-amino-7-oxononanoate synthase	0	1	0	2	2
15603553	AarF	0	1	0	0	11
15602760*	AceE	6	22	6	7	10
15602569*	Acetate/propionate kinase	20	25	16	11	2
15603493	Acetolactate synthase II large subunit	1	1	0	0	8
15602735*	Acetolactate synthase III large subunit	1	1	1	3	16
15602157*	Acetyl-CoA carboxylase alpha subunit	3	4	5	1	33
15602501	Acetyl-CoA carboxylase beta subunit	0	1	1	1	6
15602957*	Acetyl-CoA carboxylase	2	4	5	1	40
15602956*	Acetyl-CoA carboxylase	4	7	3	7	31
15602557	Acetyl-coenzyme A synthetase	1	1	0	0	23
15602069*	Aconitate hydratase	0	2	2	2	23
15602997	AcrB	0	0	0	1	1
15603782*	Acyl carrier protein	7	9	4	7	45
15603780*	Acyl carrier protein S-malonyltransferase	1	2	3	2	10
15602572*	Acyl-CoA synthase	2	1	1	0	3
15602228*	Adenine phosphoribosyltransferase	2	0	1	1	4
15603765	Adenosylmethionine--8-amino-7-oxononanoate transaminase	0	1	0	0	4
15602149*	Adenylate kinase	1	7	13	4	4
15603716*	Adenylosuccinate lyase	3	2	2	1	15
15602803*	Adenylosuccinate synthetase	1	3	4	6	14
15603318*	Adh2	51	63	35	34	32
15602818	AfuA	1	0	1	0	2
15602822*	AfuC	0	3	0	1	1
15603246	Agmatinase	0	1	0	0	54
15603152*	Alanyl-tRNA synthetase	3	6	2	1	13
15602566*	Amidophosphoribosyltransferase	0	2	1	0	53
15603783	Anaerobic C4-dicarboxylate trAnsporter	0	1	1	0	9
15603306*	Anaerobic glycerol-3-phosphate dehydrogenase subunit B	2	5	1	1	4
15602805	Anaerobic ribonucleoside triphosphate reductase	1	1	0	1	20
15602449	AnthrAnilate synthase component I	0	1	0	1	13
15602897	Apolipoprotein N-acyltransferase	1	0	0	1	17
15602084*	ArcA	2	4	3	3	82
15602178*	ArcB	1	1	2	1	50
15602985*	Argininosuccinate lyase	2	1	2	1	6
15602416*	Arginyl-tRNA synthetase	0	2	0	0	5
15601904	Ars	1	1	1	0	0
15601989*	ArtI	2	2	3	1	8
15601991	ArtM	0	1	1	0	5
15601988	ArtP	0	0	1	0	7
15602629	Ascorbate-specific PTS system enzyme IIC	0	1	0	0	5
15602968*	AspA	0	6	1	0	16
15603439	Asparagine synthetase AsnA	1	0	0	0	13
15602508*	Asparaginyl-tRNA synthetase	1	3	2	3	2
15601917*	Aspartate aminotransferase	1	3	1	2	0
15602486	Aspartate aminotransferase	1	0	0	0	8
15603497	Aspartate-semialdehyde dehydrogenase	1	1	1	0	6
15602848*	Aspartyl-tRNA synthetase	3	2	1	0	2
15603060	ATP phosphoribosyltransferase	1	0	0	0	5
15603357*	ATP synthase subunit A	7	14	10	8	20
15603353	ATP synthase subunit A	0	1	0	0	13
15603359*	ATP synthase subunit B	30	31	14	18	23
15603355*	ATP synthase subunit B	3	3	1	0	11
15603358*	ATP synthase subunit C	1	3	0	0	18
15603356*	ATP synthase subunit D	4	5	2	1	15
15603360	ATP synthase subunit epsilon	0	1	0	1	27
15603841*	ATP-dependent Clp protease proteolytic subunit	0	0	2	1	1
15603702*	ATP-dependent helicase HepA	0	1	3	0	15
15603613*	ATP-dependent protease ATP-binding subunit	6	5	5	1	26
15603842*	ATP-dependent protease ATP-binding subunit	0	2	2	1	87
15603614*	ATP-dependent protease peptidase subunit	3	5	3	3	27
15603786	ATP-dependent RNA helicase	1	0	0	0	5
15603688	AttE	1	0	0	1	0
15602917	Bacterioferritin comigratory protein	1	1	0	0	3
15601978*	Bifunctional aspartokinase I/homeserine dehydrogenase I	3	3	0	2	4
15602158	Bifunctional GMP synthase/glutamine amidotransferase protein	1	1	1	0	7
15603671*	Bifunctional N-acetylglucosamine-1-phosphate uridyltransferase/glucosamine-1-phosphate acetyltransferase	3	7	2	1	5
15602087	Bifunctional phosphoribosylaminoimidazolecarboxamide formyltransferase/IMP cyclohydrolase	0	0	1	0	7
15602244*	BioB	2	3	3	2	4
15602431*	Branched-chain amino acid aminotransferase	1	4	1	1	18
15603370*	Carbamoyl-phosphate synthase large subunit	1	3	0	1	7
15603153*	Carbon storage regulator	3	0	2	0	9
15602112	Cca	0	1	0	0	1
15601875*	CcmF	2	0	0	0	11
15601878*	CcmH	2	1	0	0	6
15602012*	Cell division protein FtsZ	4	7	2	4	157
15603560*	Cell division protein ZipA	2	3	2	1	18
15602833*	Cell envelope integrity inner membrane protein TolA	0	0	2	0	0
15602972*	Chaperonin GroEL	47	73	38	52	325
15602224*	Chorismate synthase	1	1	3	5	2
15603026*	Chromosomal replication initiation protein	2	4	3	4	135
15603569*	ClpB	6	10	3	6	9
15602971*	Co-chaperonin GroES	6	13	18	18	100
15603090	ComE	0	0	0	1	32
15603421	ComF	1	0	0	0	0
15603375	ComM	0	0	1	0	10
15602474*	Condesin subunit B	0	4	2	0	12
15602473	Condesin subunit E	0	1	0	1	4
15603698	Coproporphyrinogen III oxidase	0	1	0	0	4
15603022	Crp	0	0	0	1	86
15603737*	CTP synthetase	1	2	0	0	90
15603245*	CvgSY	0	1	1	2	0
15602839	CydA	0	1	1	0	3
15603339	CydD	0	1	0	0	2
15602525*	CysB	5	5	4	4	36
15603295	CysE	0	1	0	0	6
15603558*	CysK	13	17	19	15	14
15602659*	Cystathionine beta-lyase	1	2	1	0	16
15602183*	Cysteine desulfurase	2	3	4	2	43
15602810*	Cysteinyl-tRNA synthetase	3	2	5	2	6
15603792*	DacA	0	0	2	2	0
15602009	D-alanylalanine synthetase	0	0	1	1	8
15602523*	DapD	2	5	2	1	7
15603390	DctP	0	0	0	1	0
15602977*	DeaD	2	1	5	1	2
15602613	DegS	0	1	0	0	45
15603557	Delta-aminolevulinic acid dehydratase	1	1	0	1	6
15603209*	DeoR	0	4	0	0	16
15603208	Deoxyribose-phosphate aldolase	0	0	1	0	1
15601953	Dephospho-CoA kinase	0	1	0	0	1
15603596*	D-fructose-6-phosphate amidotransferase	0	9	4	3	11
15602591*	Dihydrodipicolinate reductase	5	3	2	1	3
15602916*	Dihydrodipicolinate synthase	0	1	1	5	3
15602759*	Dihydrolipoamide acetyltransferase	12	6	6	4	25
15602758*	Dihydrolipoamide dehydrogenase	15	26	14	9	17
15603074*	Dimethyladenosine transferase	0	2	0	0	50
15601911	Disulfide bond formation protein B	0	1	0	0	37
15602506	Dithiobiotin synthetase	0	1	0	0	1
15602728	DksA	0	1	1	0	64
15602706*	DNA gyrase subunit A	3	2	2	1	42
15603341*	DNA gyrase subunit B	2	9	5	3	39
15603581*	DNA ligase	0	0	2	2	7
15602769*	DNA mismatch repair protein	18	15	13	10	56
15603695	DNA mismatch repair protein	0	1	0	0	84
15602930*	DNA polymerase I	1	5	0	0	57
15601899*	DNA polymerase III subunit alpha	4	2	2	1	22
15603025	DNA polymerase III subunit beta	0	0	1	1	27
15603081	DNA polymerase III subunit delta	0	1	0	0	5
15601971	DNA polymerase III subunit epsilon	0	1	0	0	11
15602229	DNA polymerase III subunits gamma and tau	1	0	1	1	17
15603105	DNA primase	0	1	0	0	49
15602480*	DNA topoisomerase I	3	4	2	2	44
15602072*	DNA topoisomerase III	1	1	2	0	12
15602235*	DNA topoisomerase IV subunit B	1	2	2	1	15
15602951*	DNA-binding protein Fis	1	1	1	2	19
15603255*	DNA-directed RNA polymerase alpha subunit	11	24	18	14	32
15603602*	DNA-directed RNA polymerase beta subunit	6	11	7	7	71
15603601*	DNA-directed RNA polymerase beta~ subunit	15	25	21	13	14
15602786*	DNA-directed RNA polymerase omega subunit	0	4	2	3	8
15602605	DnaJ	0	1	1	1	9
15602601*	DnaK	31	41	30	23	2
15602575	Dnt	0	1	0	0	30
15602101*	DppA	2	1	0	0	17
15602104	DppD	1	0	0	0	4
15602105*	DppF	0	0	1	2	4
15603666	DsbA	0	1	0	0	57
15602056	DsbC	0	1	0	0	43
15601893	DsbE	0	1	0	0	4
15602250*	Electron transport complex protein RnfC	0	1	2	1	2
15603221*	Elongation factor EF-2	59	44	53	46	20
15601965	Elongation factor P	0	0	0	1	6
15603850*	Elongation factor Ts	58	56	33	28	6
15603222*	Elongation factor Tu	268	257	286	251	1
15601941*	Est	1	3	0	0	0
15602722	Excinuclease ABC subunit C	0	1	0	0	22
15602033*	Exodeoxyribonuclease VII large subunit	0	2	0	0	4
15603297*	Export protein SecB	2	3	0	0	80
15602047*	FabI	15	11	13	10	38
15603860	FabZ	0	1	1	0	21
15602790	FadD	1	1	1	1	1
15603778	Fatty acid/phospholipid synthesis protein	1	0	0	0	2
15601916*	FbpA	22	17	14	9	0
15602188	Fdx-1	0	1	0	0	109
15602273*	FdxG	1	2	1	1	7
15602272*	FdxH	2	0	0	0	4
15601996*	FecB	3	5	7	3	3
15601993*	FecE	1	4	1	1	4
15603048*	Ffh	0	0	0	2	5
15602791*	FimA	1	3	1	1	6
15603432	FkpA	0	1	1	1	0
15602533	Fnr	0	1	0	0	52
15602500	FolC	0	1	1	0	5
15602304	FolP	0	0	1	0	11
15602738*	Formyltetrahydrofolate deformylase	9	10	7	7	3
15603290*	Frataxin-like protein	0	2	4	3	3
15603660	FruA	1	0	1	1	5
15602795	Fructose-1,6-bisphosphatase	0	0	0	1	6
15603726*	Fructose-bisphosphate aldolase	113	127	101	89	9
15603385*	FtsE	1	2	2	1	13
15602303*	FtsH	7	2	2	1	15
15602001	FtsI	0	0	0	1	23
15602120	FtsK	1	0	0	1	33
15602000*	FtsL	0	2	0	0	19
15603384*	FtsY	0	3	0	0	40
15602688*	Fumarate hydratase	12	22	6	12	38
15602066*	Fumarate reductase	14	16	16	3	11
15602064	Fumarate reductase subunit C	1	0	0	0	7
15602063*	Fumarate reductase subunit D	0	3	0	0	8
15602217*	Fur	2	1	2	0	36
15602900	Galactokinase	1	1	0	0	1
15602151	GalE	1	0	0	0	17
15602899	GalM	0	1	0	0	1
15602902*	GalR	2	2	2	2	18
15603154*	GalU	1	4	2	1	2
15603761*	Gamma-glutamyl kinase	0	3	1	0	9
15602801	Gamma-glutamyl phosphate reductase	0	0	0	1	8
15603103*	Gcp	0	2	0	0	0
15602432	GcvA	1	0	0	0	21
15602657*	Glk	0	2	0	0	9
15603040	GlnA	0	1	0	1	3
15603869	GlnB	0	1	0	0	63
15602240	GlnE	0	1	0	1	2
15603305*	GlpC	0	2	1	0	4
15603309*	GlpQ	2	6	3	1	3
15603308*	GlpT	0	4	0	0	7
15602141*	GltA	6	7	3	3	70
15602549	GltX	0	0	0	1	35
15603414*	Glucose-6-phosphate 1-dehydrogenase	2	1	0	0	78
15602281*	Glucose-6-phosphate isomerase	14	19	15	8	11
15603350*	Glucose-inhibited division protein A	1	2	1	0	10
15603351	Glucose-inhibited division protein B	1	0	0	0	0
15602761*	Glucose-specific PTS system enzyme IIA component	15	9	8	6	10
15602782	Glutamate racemase	1	1	0	0	4
15602393*	Glutaminyl-tRNA synthetase	0	3	2	1	2
15602980*	Glutamyl-tRNA synthetase	6	8	4	8	12
15603100*	Glutathione reductase	2	1	1	0	8
15602789*	Glyceraldehyde-3-phosphate dehydrogenase	79	71	42	24	16
15602424*	Glycerate dehydrogenase	0	3	0	0
15603311	Glycerol kinase	1	0	0	0	38
15603047*	Glycerol-3-phosphate acyltransferase	1	2	0	0	2
15602967*	Glycyl-tRNA synthetase beta subunit	5	7	0	1	3
15603605	GntP	0	1	0	1	8
15602658*	GntP	8	7	4	3	0
15602199*	GrpE	6	7	2	2	10
15602692	Grx	0	1	0	0	50
15602542*	GTP cyclohydrolase II protein	0	2	1	0	2
15601970	GTP-binding protein EngA	1	1	1	0	1
15601925	GTP-binding protein Era	1	0	1	0	3
15601928*	GTP-binding protein LepA	1	1	2	1	0
15603487*	HasR	2	1	1	1	0
15602457*	HbpA	2	6	3	8	7
15602889*	Heat shock protein 90	10	13	1	4	15
15602333*	Heat shock protein HtpX	5	6	3	5	1
15602327*	HemL	3	3	2	2	8
15602441	HemR	0	1	0	0	0
15603678	HemX	1	0	0	0	1
15602645*	HexB	2	1	0	0	0
15602644*	HexC	2	2	1	0	2
15602643	HexD	0	1	0	1	0
15601983	HflC	0	1	1	0	3
15601982	HflK	0	0	0	1	3
15602772	HflX	0	1	0	0	0
15602493*	HimA	3	3	0	0	47
15602665	HimD	1	0	0	0	2
15601897*	HktE	8	3	1	2	34
15601950	HofB	0	0	1	0	8
15602843*	Holliday junction resolvase	0	1	1	2	16
15603735	Holliday junction resolvase-like protein	1	1	0	0	2
15601979*	Homoserine kinase	1	2	1	1	4
15603395*	HpaE	2	2	0	0	0
15602634*	HrpA	4	4	4	2	0
15603402*	HsdM	0	3	0	0	0
15603406	HsdR	1	1	1	0	0
15603435*	Hsf	1	6	2	4	0
15602599*	HtrA	1	3	1	0	2
15603597*	HupA	23	15	14	19	29
15602639*	HyaE	0	2	1	0	0
15601881*	Hypothetical protein PM0016	1	3	4	1	0
15601882*	Hypothetical protein PM0017	3	1	0	0	16
15601898*	Hypothetical protein PM0033	0	1	2	1	0
15601907	Hypothetical protein PM0042	1	0	0	0	0
15601910	Hypothetical protein PM0045	1	1	0	1	0
15601929*	Hypothetical protein PM0064	21	21	17	12	13
15601931	Hypothetical protein PM0066	0	1	0	0	0
15601933	Hypothetical protein PM0068	1	0	0	0	6
15601938*	Hypothetical protein PM0073	13	10	6	9	5
15601939	Hypothetical protein PM0074	1	0	0	1	1
15601943	Hypothetical protein PM0078	0	1	0	0	9
15601957*	Hypothetical protein PM0092	17	13	13	9	4
15601975	Hypothetical protein PM0110	1	0	0	0	0
15601977	Hypothetical protein PM0112	0	0	0	1	20
15601981	Hypothetical protein PM0116	1	0	0	0	5
15601984	Hypothetical protein PM0119	1	1	0	0	0
15601997	Hypothetical protein PM0132	0	1	0	0	0
15601998	Hypothetical protein PM0133	0	1	1	0	0
15602014	Hypothetical protein PM0149	0	0	0	1	9
15602022	Hypothetical protein PM0157	0	1	0	0	0
15602024*	Hypothetical protein PM0159	8	9	8	4	0
15602026	Hypothetical protein PM0161	0	0	0	1	0
15602028	Hypothetical protein PM0163	1	1	0	0	2
15602030*	Hypothetical protein PM0165	3	1	1	1	0
15602036	Hypothetical protein PM0171	0	0	0	1	3
15602039	Hypothetical protein PM0174	1	0	0	0	2
15602042*	Hypothetical protein PM0177	2	4	2	2	1
15602044	Hypothetical protein PM0179	0	1	0	0	0
15602048*	Hypothetical protein PM0183	4	5	2	3	21
15602051*	Hypothetical protein PM0186	0	3	1	0	4
15602053	Hypothetical protein PM0188	1	1	0	0	0
15602070*	Hypothetical protein PM0205	2	3	0	0	0
15602076	Hypothetical protein PM0211	0	1	0	0	0
15602083	Hypothetical protein PM0218	0	0	0	1	18
15602096*	Hypothetical protein PM0231	0	2	0	0	0
15602098*	Hypothetical protein PM0233	0	0	1	4	2
15602099*	Hypothetical protein PM0234	1	2	0	0	0
15602106*	Hypothetical protein PM0241	2	0	0	1	11
15602108*	Hypothetical protein PM0243	3	4	1	2	0
15602113*	Hypothetical protein PM0248	2	1	1	1	0
15602115	Hypothetical protein PM0250	0	1	1	1	0
15602132*	Hypothetical protein PM0267	2	0	0	0	0
15602136	Hypothetical protein PM0271	0	1	0	0	0
15602140*	Hypothetical protein PM0275	5	3	3	2	0
15602147	Hypothetical protein PM0282	0	1	0	0	0
15602148	Hypothetical protein PM0283	0	1	0	0	0
15602150	Hypothetical protein PM0285	1	0	0	0	4
15602156	Hypothetical protein PM0291	0	1	0	0	0
15602159	Hypothetical protein PM0294	0	0	1	0	0
15602162*	Hypothetical protein PM0297	0	0	0	2	0
15602164*	Hypothetical protein PM0299	9	5	4	4	0
15602165	Hypothetical protein PM0300	1	0	0	0	0
15602169	Hypothetical protein PM0304	0	1	0	0	1
15602172	Hypothetical protein PM0307	1	0	1	0	0
15602173	Hypothetical protein PM0308	0	0	0	1	0
15602177*	Hypothetical protein PM0312	4	2	0	0	0
15602182	Hypothetical protein PM0317	0	1	0	0	0
15602202	Hypothetical protein PM0337	1	1	1	1	0
15602205	Hypothetical protein PM0340	0	1	0	0	0
15602216	Hypothetical protein PM0351	0	1	0	0	23
15602219	Hypothetical protein PM0354	0	0	0	1	0
15602220	Hypothetical protein PM0355	1	0	0	0	1
15602223*	Hypothetical protein PM0358	3	1	0	0	7
15602226	Hypothetical protein PM0361	0	0	1	0	0
15602237	Hypothetical protein PM0372	0	1	0	0	0
15602238	Hypothetical protein PM0373	0	0	0	1	0
15602239*	Hypothetical protein PM0374	2	1	0	0	0
15602255*	Hypothetical protein PM0390	2	3	1	2	0
15602257	Hypothetical protein PM0392	0	0	1	0	0
15602260*	Hypothetical protein PM0395	0	3	0	1	0
15602290*	Hypothetical protein PM0425	3	3	5	2	2
15602293	Hypothetical protein PM0428	0	1	0	0	4
15602295	Hypothetical protein PM0430	0	1	0	0	0
15602307*	Hypothetical protein PM0442	2	6	4	1	0
15602309	Hypothetical protein PM0444	2	4	10	16	0
15602314*	Hypothetical protein PM0449	0	0	0	2	0
15602317	Hypothetical protein PM0452	1	0	0	0	0
15602318*	Hypothetical protein PM0453	1	3	1	0	0
15602320*	Hypothetical protein PM0455	2	0	1	2	0
15602329*	Hypothetical protein PM0464	2	2	0	0	0
15602330*	Hypothetical protein PM0465	2	0	0	0	0
15602331*	Hypothetical protein PM0466	1	2	2	1	2
15602334	Hypothetical protein PM0469	0	1	0	0	0
15602337*	Hypothetical protein PM0472	3	2	2	3	0
15602338	Hypothetical protein PM0473	0	0	0	1	0
15602340	Hypothetical protein PM0475	0	0	0	1	0
15602344	Hypothetical protein PM0479	0	0	0	1	0
15602347	Hypothetical protein PM0482	0	0	0	1	0
15602352	Hypothetical protein PM0487	0	1	0	0	0
15602360	Hypothetical protein PM0495	0	1	0	0	0
15602366	Hypothetical protein PM0501	0	0	0	1	0
15602375	Hypothetical protein PM0510	0	0	0	1	0
15602378	Hypothetical protein PM0513	0	1	0	0	0
15602384*	Hypothetical protein PM0519	2	4	2	1	0
15602389	Hypothetical protein PM0524	0	1	0	0	2
15602392	Hypothetical protein PM0527	1	0	0	1	15
15602418*	Hypothetical protein PM0553	1	0	3	3	0
15602422	Hypothetical protein PM0557	0	1	0	0	0
15602425	Hypothetical protein PM0560	1	0	0	0	3
15602426	Hypothetical protein PM0561	0	1	1	0	6
15602433	Hypothetical protein PM0568	1	0	0	0	0
15602439	Hypothetical protein PM0574	0	1	0	0	8
15602447	Hypothetical protein PM0582	0	1	0	0	0
15602452*	Hypothetical protein PM0587	0	1	0	2	3
15602455	Hypothetical protein PM0590	1	0	0	0	0
15602456	Hypothetical protein PM0591	1	0	0	0	0
15602460*	Hypothetical protein PM0595	2	2	0	2	0
15602462	Hypothetical protein PM0597	0	0	0	1	8
15602465	Hypothetical protein PM0600	1	0	0	0	0
15602471	Hypothetical protein PM0606	0	0	1	0	1
15602477	Hypothetical protein PM0612	0	0	1	0	0
15602478	Hypothetical protein PM0613	0	0	1	0	0
15602479	Hypothetical protein PM0614	0	0	0	1	0
15602492*	Hypothetical protein PM0627	1	2	0	1	2
15602503	Hypothetical protein PM0638	0	0	1	0	0
15602510	Hypothetical protein PM0645	1	1	1	1	0
15602514	Hypothetical protein PM0649	1	0	1	0	2
15602517	Hypothetical protein PM0652	0	1	0	0	1
15602524*	Hypothetical protein PM0659	1	4	5	3	0
15602526*	Hypothetical protein PM0661	0	2	1	0	3
15602528*	Hypothetical protein PM0663	2	1	3	0	0
15602534	Hypothetical protein PM0669	0	0	0	1	6
15602535*	Hypothetical protein PM0670	3	3	1	0	0
15602537	Hypothetical protein PM0672	0	1	0	0	0
15602540*	Hypothetical protein PM0675	3	4	2	2	0
15602552	Hypothetical protein PM0687	0	1	0	0	0
15602556*	Hypothetical protein PM0691	3	3	2	0	2
15602561*	Hypothetical protein PM0696	1	0	0	3	0
15602562	Hypothetical protein PM0697	0	0	0	1	0
15602563	Hypothetical protein PM0698	1	0	0	0	0
15602564*	Hypothetical protein PM0699	2	1	4	2	0
15602568*	Hypothetical protein PM0703	1	2	0	0	0
15602578	Hypothetical protein PM0713	0	1	0	0	0
15602600*	Hypothetical protein PM0735	1	2	2	1	0
15602606	Hypothetical protein PM0741	0	0	0	1	0
15602615*	Hypothetical protein PM0750	3	2	3	4	0
15602616	Hypothetical protein PM0751	0	0	1	0	0
15602627	Hypothetical protein PM0762	0	1	1	0	0
15602631*	Hypothetical protein PM0766	1	2	2	0	0
15602633*	Hypothetical protein PM0768	1	1	2	1	0
15602640*	Hypothetical protein PM0775	1	0	2	0	0
15602641*	Hypothetical protein PM0776	2	0	0	0	48
15602642	Hypothetical protein PM0777	1	0	0	0	0
15602647*	Hypothetical protein PM0782	0	2	0	0	0
15602650	Hypothetical protein PM0785	0	1	0	0	0
15602651*	Hypothetical protein PM0786	79	74	52	26	75
15602652*	Hypothetical protein PM0787	4	3	0	0	0
15602656	Hypothetical protein PM0791	0	1	0	0	2
15602668*	Hypothetical protein PM0803	0	5	2	0	0
15602676*	Hypothetical protein PM0811	1	1	3	4	0
15602682*	Hypothetical protein PM0817	4	1	0	2	7
15602684	Hypothetical protein PM0819	0	1	0	0	0
15602699*	Hypothetical protein PM0834	21	27	16	12	9
15602700	Hypothetical protein PM0835	1	0	0	0	0
15602701*	Hypothetical protein PM0836	2	1	1	0	1
15602707	Hypothetical protein PM0842	0	0	0	1	0
15602715*	Hypothetical protein PM0850	0	2	0	1	0
15602718	Hypothetical protein PM0853	0	1	1	0	0
15602719	Hypothetical protein PM0854	1	1	0	1	0
15602748	Hypothetical protein PM0883	1	0	0	0	0
15602752*	Hypothetical protein PM0887	5	6	5	2	0
15602754*	Hypothetical protein PM0889	1	3	0	0	0
15602774	Hypothetical protein PM0909	0	1	0	0	3
15602775	Hypothetical protein PM0910	1	1	0	1	0
15602781	Hypothetical protein PM0916	0	1	0	0	15
15602794*	Hypothetical protein PM0929	2	2	1	0	3
15602797	Hypothetical protein PM0932	1	1	0	0	0
15602804	Hypothetical protein PM0939	1	0	0	0	1
15602811	Hypothetical protein PM0946	0	1	0	1	0
15602813	Hypothetical protein PM0948	0	1	0	0	8
15602831*	Hypothetical protein PM0966	3	8	2	2	9
15602836*	Hypothetical protein PM0971	0	1	2	0	3
15602844*	Hypothetical protein PM0979	18	5	11	12	0
15602845*	Hypothetical protein PM0980	3	2	0	1	0
15602855	Hypothetical protein PM0990	0	1	0	0	13
15602863*	Hypothetical protein PM0998	2	3	1	0	3
15602864*	Hypothetical protein PM0999	0	3	3	6	0
15602865	Hypothetical protein PM1000	0	1	0	0	0
15602866*	Hypothetical protein PM1001	2	0	2	0	4
15602868	Hypothetical protein PM1003	1	1	0	0	26
15602879	Hypothetical protein PM1014	1	0	0	0	8
15602886	Hypothetical protein PM1021	0	1	0	0	0
15602888	Hypothetical protein PM1023	1	0	1	0	0
15602909	Hypothetical protein PM1044	1	1	1	0	0
15602912	Hypothetical protein PM1047	0	1	0	0	0
15602915	Hypothetical protein PM1050	1	1	0	0	0
15602922*	Hypothetical protein PM1057	1	2	1	0	0
15602929	Hypothetical protein PM1064	1	0	1	0	0
15602934*	Hypothetical protein PM1069	1	2	1	0	14
15602935	Hypothetical protein PM1070	0	1	1	1	0
15602937	Hypothetical protein PM1072	1	0	0	0	1
15602943	Hypothetical protein PM1078	1	0	1	2	13
15602945	Hypothetical protein PM1080	0	0	0	1	6
15602946*	Hypothetical protein PM1081	1	2	1	1	0
15602947	Hypothetical protein PM1082	1	1	1	0	0
15602949*	Hypothetical protein PM1084	1	2	0	0	0
15602962	Hypothetical protein PM1097	0	1	0	1	0
15602966	Hypothetical protein PM1101	0	1	0	0	0
15602978	Hypothetical protein PM1113	1	0	0	0	2
15602981	Hypothetical protein PM1116	0	0	1	0	0
15602991	Hypothetical protein PM1126	0	0	1	0	0
15602992*	Hypothetical protein PM1127	1	0	1	2	0
15602998	Hypothetical protein PM1133	0	0	1	0	6
15603003	Hypothetical protein PM1138	0	0	1	0	0
15603006	Hypothetical protein PM1141	0	1	0	0	0
15603009*	Hypothetical protein PM1144	1	2	1	2	0
15603011	Hypothetical protein PM1146	0	1	0	0	0
15603014	Hypothetical protein PM1149	1	1	0	0	0
15603032	Hypothetical protein PM1167	0	1	0	0	0
15603036	Hypothetical protein PM1171	0	0	1	0	0
15603038*	Hypothetical protein PM1173	3	3	2	4	20
15603050	Hypothetical protein PM1185	0	0	0	1	0
15603055	Hypothetical protein PM1190	1	0	0	1	0
15603058*	Hypothetical protein PM1193	19	21	17	13	19
15603059*	Hypothetical protein PM1194	2	5	0	1	0
15603076*	Hypothetical protein PM1211	2	2	2	2	0
15603082	Hypothetical protein PM1217	0	0	1	0	0
15603098*	Hypothetical protein PM1233	2	2	0	0	0
15603111*	Hypothetical protein PM1246	1	2	0	1	11
15603113*	Hypothetical protein PM1248	3	2	0	0	0
15603114	Hypothetical protein PM1249	0	0	0	1	0
15603117*	Hypothetical protein PM1252	2	0	1	0	0
15603121	Hypothetical protein PM1256	1	0	0	0	0
15603128	Hypothetical protein PM1263	0	1	0	0	0
15603131	Hypothetical protein PM1266	0	1	0	0	4
15603132*	Hypothetical protein PM1267	3	6	4	2	0
15603134*	Hypothetical protein PM1269	2	1	3	2	0
15603137	Hypothetical protein PM1272	1	1	0	0	1
15603138*	Hypothetical protein PM1273	3	1	0	0	6
15603139*	Hypothetical protein PM1274	0	1	0	2	6
15603142	Hypothetical protein PM1277	0	1	0	0	3
15603143*	Hypothetical protein PM1278	2	3	1	0	0
15603144*	Hypothetical protein PM1279	9	7	2	4	0
15603147	Hypothetical protein PM1282	0	1	0	0	0
15603159	Hypothetical protein PM1294	0	0	1	0	0
15603164	Hypothetical protein PM1299	0	1	0	0	0
15603165	Hypothetical protein PM1300	0	1	0	0	0
15603166	Hypothetical protein PM1301	0	1	1	0	0
15603172*	Hypothetical protein PM1307	0	2	1	1	3
15603181*	Hypothetical protein PM1316	5	5	2	1	0
15603185	Hypothetical protein PM1320	0	1	1	0	17
15603189*	Hypothetical protein PM1324	4	2	1	0	1
15603190	Hypothetical protein PM1325	0	0	1	1	2
15603212*	Hypothetical protein PM1347	1	3	3	1	0
15603217*	Hypothetical protein PM1352	0	2	1	0	0
15603223	Hypothetical protein PM1358	0	1	0	0	0
15603225	Hypothetical protein PM1360	1	0	1	0	0
15603227	Hypothetical protein PM1362	0	0	0	1	0
15603232*	Hypothetical protein PM1367	0	1	1	3	0
15603236	Hypothetical protein PM1371	0	0	1	0	25
15603240	Hypothetical protein PM1375	1	0	0	0	0
15603243*	Hypothetical protein PM1378	2	2	4	0	3
15603244*	Hypothetical protein PM1379	0	2	0	0	3
15603288*	Hypothetical protein PM1423	0	2	0	0	0
15603291	Hypothetical protein PM1426	0	1	0	0	19
15603293	Hypothetical protein PM1428	1	0	0	1	0
15603298	Hypothetical protein PM1433	0	0	1	0	0
15603300*	Hypothetical protein PM1435	1	2	0	0	0
15603313*	Hypothetical protein PM1448	2	1	0	0	3
15603314*	Hypothetical protein PM1449	3	3	3	1	0
15603322	Hypothetical protein PM1457	1	1	1	0	2
15603325*	Hypothetical protein PM1460	0	2	1	0	17
15603327	Hypothetical protein PM1462	0	0	1	0	0
15603330	Hypothetical protein PM1465	0	1	0	0	0
15603331*	Hypothetical protein PM1466	2	4	3	1	2
15603333	Hypothetical protein PM1468	0	0	0	1	0
15603334	Hypothetical protein PM1469	1	0	0	1	0
15603336*	Hypothetical protein PM1471	2	0	0	0	0
15603337	Hypothetical protein PM1472	1	0	0	0	0
15603342	Hypothetical protein PM1477	0	1	0	0	0
15603343*	Hypothetical protein PM1478	0	0	0	2	0
15603345	Hypothetical protein PM1480	0	0	1	0	1
15603346	Hypothetical protein PM1481	0	1	0	0	5
15603348*	Hypothetical protein PM1483	11	9	5	7	0
15603365	Hypothetical protein PM1500	0	0	0	1	0
15603372	Hypothetical protein PM1507	0	1	0	1	4
15603373	Hypothetical protein PM1508	0	0	1	0	2
15603374*	Hypothetical protein PM1509	0	2	0	0	0
15603378	Hypothetical protein PM1513	1	0	0	1	10
15603379*	Hypothetical protein PM1514	3	1	0	0	0
15603388	Hypothetical protein PM1523	1	0	1	0	0
15603404	Hypothetical protein PM1539	0	1	0	0	0
15603405	Hypothetical protein PM1540	0	1	0	0	0
15603408	Hypothetical protein PM1543	1	0	0	0	0
15603409	Hypothetical protein PM1544	0	0	1	0	4
15603410	Hypothetical protein PM1545	0	1	0	0	0
15603411	Hypothetical protein PM1546	0	1	0	0	2
15603417	Hypothetical protein PM1552	0	1	0	0	0
15603420*	Hypothetical protein PM1555	1	3	0	0	0
15603427	Hypothetical protein PM1562	0	0	1	1	0
15603431*	Hypothetical protein PM1566	0	1	0	2	0
15603436	Hypothetical protein PM1571	0	1	0	0	0
15603441	Hypothetical protein PM1576	0	0	0	1	0
15603442	Hypothetical protein PM1577	0	0	1	0	1
15603443	Hypothetical protein PM1578	1	0	0	0	0
15603448*	Hypothetical protein PM1583	0	3	0	0	0
15603453	Hypothetical protein PM1588	1	1	0	1	0
15603468	Hypothetical protein PM1603	0	1	0	0	0
15603469*	Hypothetical protein PM1604	0	2	0	1	6
15603474	Hypothetical protein PM1609	1	1	0	0	5
15603479*	Hypothetical protein PM1614	6	1	6	0	2
15603494	Hypothetical protein PM1629	0	0	1	0	0
15603500	Hypothetical protein PM1635	1	1	0	2	0
15603501	Hypothetical protein PM1636	1	0	1	1	0
15603502*	Hypothetical protein PM1637	2	0	0	0	0
15603506	Hypothetical protein PM1641	0	1	0	0	0
15603511	Hypothetical protein PM1646	1	0	0	0	2
15603513*	Hypothetical protein PM1648	0	1	2	0	1
15603518*	Hypothetical protein PM1653	2	1	1	0	0
15603521*	Hypothetical protein PM1656	0	4	1	0	0
15603530*	Hypothetical protein PM1665	2	4	0	2	3
15603533*	Hypothetical protein PM1668	2	0	3	1	0
15603542	Hypothetical protein PM1677	0	0	1	0	0
15603543	Hypothetical protein PM1678	0	0	0	1	0
15603546*	Hypothetical protein PM1681	2	1	1	0	0
15603548*	Hypothetical protein PM1683	2	1	1	1	0
15603550*	Hypothetical protein PM1685	0	2	0	0	1
15603567	Hypothetical protein PM1702	0	0	0	1	0
15603572*	Hypothetical protein PM1707	10	3	5	4	0
15603573	Hypothetical protein PM1708	1	1	0	0	0
15603574*	Hypothetical protein PM1709	16	15	10	14	0
15603582	Hypothetical protein PM1717	0	1	1	0	27
15603583*	Hypothetical protein PM1718	1	2	0	0	0
15603585	Hypothetical protein PM1720	0	1	0	0	0
15603592*	Hypothetical protein PM1727	2	4	4	5	5
15603598	Hypothetical protein PM1733	0	1	1	0	0
15603624*	Hypothetical protein PM1759	0	2	1	1	0
15603625	Hypothetical protein PM1760	0	1	0	0	5
15603627	Hypothetical protein PM1762	0	0	1	0	2
15603628	Hypothetical protein PM1763	1	0	0	0	0
15603630	Hypothetical protein PM1765	0	0	1	0	0
15603635	Hypothetical protein PM1770	0	1	0	0	0
15603636*	Hypothetical protein PM1771	2	1	1	1	0
15603639	Hypothetical protein PM1774	1	1	1	0	0
15603644	Hypothetical protein PM1779	1	0	0	1	0
15603646	Hypothetical protein PM1781	0	0	1	0	0
15603647	Hypothetical protein PM1782	1	0	0	0	0
15603648	Hypothetical protein PM1783	0	0	1	0	0
15603656	Hypothetical protein PM1791	1	1	0	0	12
15603657	Hypothetical protein PM1792	1	0	0	0	14
15603663	Hypothetical protein PM1798	0	0	1	0	0
15603665*	Hypothetical protein PM1800	0	1	3	1	0
15603667*	Hypothetical protein PM1802	6	5	4	3	0
15603670*	Hypothetical protein PM1805	0	3	0	0	0
15603672*	Hypothetical protein PM1807	0	0	0	2	6
15603673*	Hypothetical protein PM1808	2	1	0	1	0
15603679*	Hypothetical protein PM1814	0	0	1	2	5
15603684	Hypothetical protein PM1819	1	1	0	0	0
15603685	Hypothetical protein PM1820	0	1	0	0	0
15603689	Hypothetical protein PM1824	0	1	0	0	0
15603693*	Hypothetical protein PM1828	1	2	0	0	0
15603694	Hypothetical protein PM1829	0	0	1	0	0
15603700*	Hypothetical protein PM1835	3	1	4	1	0
15603707	Hypothetical protein PM1842	0	0	0	2	0
15603708	Hypothetical protein PM1843	0	1	0	0	5
15603718*	Hypothetical protein PM1853	7	3	1	5	0
15603719*	Hypothetical protein PM1854	2	1	0	2	7
15603720*	Hypothetical protein PM1855	3	2	3	0	0
15603724	Hypothetical protein PM1859	1	0	0	0	0
15603727	Hypothetical protein PM1862	1	1	1	0	0
15603739*	Hypothetical protein PM1874	0	0	1	2	0
15603740*	Hypothetical protein PM1875	0	2	0	0	0
15603748*	Hypothetical protein PM1883	2	1	0	1	0
15603749	Hypothetical protein PM1884	1	1	0	0	0
15603751*	Hypothetical protein PM1886	1	2	1	1	0
15603757	Hypothetical protein PM1892	0	0	0	1	36
15603762	Hypothetical protein PM1897	0	1	0	0	0
15603763*	Hypothetical protein PM1898	0	2	0	0	38
15603770*	Hypothetical protein PM1905	18	11	6	4	31
15603787*	Hypothetical protein PM1922	0	2	2	2	0
15603788*	Hypothetical protein PM1923	2	1	1	0	0
15603791*	Hypothetical protein PM1926	0	1	1	3	0
15603801	Hypothetical protein PM1936	0	0	0	1	0
15603802*	Hypothetical protein PM1937	0	1	2	0	0
15603803	Hypothetical protein PM1938	1	0	0	0	15
15603805	Hypothetical protein PM1940	0	0	1	1	3
15603811*	Hypothetical protein PM1946	2	0	0	0	0
15603812	Hypothetical protein PM1947	1	0	0	1	0
15603813*	Hypothetical protein PM1948	0	2	0	0	0
15603814	Hypothetical protein PM1949	0	1	0	0	0
15603828	Hypothetical protein PM1963	0	0	1	0	0
15603830*	Hypothetical protein PM1965	0	2	1	0	12
15603834	Hypothetical protein PM1969	0	1	0	0	6
15603838	Hypothetical protein PM1973	0	1	1	0	0
15603839*	Hypothetical protein PM1974	4	3	3	2	0
15603844	Hypothetical protein PM1979	1	1	0	0	9
15603847	Hypothetical protein PM1982	0	0	1	0	10
15603848	Hypothetical protein PM1983	0	1	0	0	0
15603854	Hypothetical protein PM1989	1	1	0	0	5
15603857	Hypothetical protein PM1992	0	1	0	0	12
15603866	Hypothetical protein PM2001	0	1	0	0	0
15603867	Hypothetical protein PM2002	0	1	0	0	1
15603870	Hypothetical protein PM2005	0	0	0	1	0
15603871	Hypothetical protein PM2006	0	1	0	0	0
15603874	Hypothetical protein PM2009	0	1	0	0	0
15601986*	Hypoxanthine-guanine phosphoribosyltransferase	0	2	1	0	16
15603845	IbeB	1	1	0	1	0
15603065	Imidazole glycerol-phosphate dehydratase/histidinol phosphatase	1	0	0	0	3
15603056*	Inorganic pyrophosphatase	6	4	3	3	18
15602160*	Inositol-5-monophosphate dehydrogenase	2	1	3	0	32
15602184*	IscU	1	0	3	1	55
15603527*	Isoleucyl-tRNA synthetase	9	10	5	10	4
15603825	Isopropylmalate isomerase large subunit	0	0	1	0	3
15602398	IspA	0	0	1	0	60
15602211*	IspB	3	3	1	2	13
15603632	IunH	0	0	1	0	1
15602812	Keto-hydroxyglutarate-aldolase/keto-deoxy-phosphogluconate aldolase	1	0	0	1	5
15603149*	Ketol-acid reductoisomerase	2	1	0	0	5
15602390	KpsF	1	0	1	1	0
15603377*	LapB	1	1	0	2	0
15603717*	LctP	0	1	1	2	4
15602060*	Leucyl aminopeptidase	2	2	1	0	2
15603079	Leucyl-tRNA synthetase	1	0	0	0	1
15602227*	Lipid A biosynthesis lauroyl acyltransferase	0	0	0	2	31
15603862*	Lipid-A-disaccharide synthase	0	4	1	0	1
15602153	LldD	1	0	0	1	5
15603843*	Lon	2	4	2	4	17
15603008	LosA	0	1	1	0	0
15602419*	Lpp	2	1	6	6	0
15602511	LppC	1	1	0	0	0
15603109	L-ribulose-5-phosphate 4-epimerase	0	1	0	0	4
15602119*	Lrp	4	5	11	4	126
15601921*	LspB	1	2	1	0	12
15603289*	LysA	2	2	1	0	5
15602054*	Lysyl-tRNA synthetase	0	4	1	1	16
15602415*	Malate dehydrogenase	11	17	8	10	48
15602405	MalQ	1	0	0	0	7
15603150	MazG	0	1	0	0	0
15601918	Menaquinone-specific isochorismate synthase	1	1	1	1	4
15603078	MerP	0	1	0	0	0
15602603	MetC	0	1	0	0	0
15602324	Methionine aminopeptidase	0	0	1	0	13
15602168*	Methionyl-tRNA synthetase	1	2	4	0	19
15602259*	Methylglyoxal synthase	3	3	2	1	3
15602286	MetR	1	1	0	0	0
15602906	Mfd	0	1	0	1	13
15602904	MglA	0	1	0	0	14
15602903*	MglB	3	2	1	1	16
15602308	MinC	0	1	0	0	46
15602507	Mlc	0	0	0	1	90
15603186	MltC	1	0	0	0	3
15602488	MoaD	0	0	1	0	0
15602609*	ModA	1	3	1	0	14
15602607	ModC	0	1	1	1	3
15602611*	ModE	0	2	0	0	27
15602559	MoeA	0	0	0	1	20
15602976*	Molybdenum transport protein	4	3	3	4	12
15602560	Molybdopterin biosynthesis protein MoeB	0	1	1	0	23
15603664	Molybdopterin-guanine dinucleotide biosynthesis protein A	1	0	0	0	17
15602189	Monofunctional biosynthetic peptidoglycan transglycosylase	0	1	0	0	5
15603820*	MreB	2	3	3	3	14
15602305	MrsA	1	1	0	0	9
15602726	MsbA	1	1	0	0	17
15602520*	MsmB	24	20	15	2	0
15602969	MtrF	0	1	0	0	0
15602516	Multidrug efflux protein NorA	0	1	0	0	2
15603184	MutY	0	1	0	0	44
15603525	MviN	0	0	1	0	2
15603193*	Na(+)-translocating NADH-quinone reductase subunit A	12	20	10	8	0
15603194	Na(+)-translocating NADH-quinone reductase subunit B	0	1	0	0	0
15603195	Na(+)-translocating NADH-quinone reductase subunit C	0	1	0	0	0
15603198*	Na(+)-translocating NADH-quinone reductase subunit F	0	4	1	1	0
15602983	N-acetyl-gamma-glutamyl-phosphate reductase	0	1	0	0	2
15602007*	N-acetylglucosaminyl transferase	2	2	0	0	18
15602693	N-acetylglutamate synthase	1	0	0	0	6
15603580*	N-acetylneuraminate lyase	4	2	3	2	2
15602739	NagA	0	1	0	0	2
15602548*	NagC	6	6	2	2	12
15603459*	NapA	8	11	1	5	6
15603457	NapF	1	1	0	0	109
15602961	Naphthoate synthase	0	0	0	1	11
15603675	NarP	0	1	0	0	17
15603456	NarQ	1	0	1	1	27
15602025	N-carbamoyl-L-amino acid amidohydrolase	1	0	0	0	11
15602052*	NeuA	1	5	0	0	0
15602230	NhaP	0	0	1	0	0
15603252*	Nicotinamide-nucleotide adenylyltransferase	2	1	1	1	15
15602747	NifS	0	0	0	1	12
15601888*	NrfA	0	1	0	2	24
15601889*	NrfB	5	2	3	1	8
15601890	NrfC	0	0	1	0	7
15601895	NrfF	0	1	0	0	3
15602246	Nth	0	0	1	0	5
15602893	Nucleoside diphosphate kinase	1	1	1	0	29
15601963*	OapA	7	2	3	1	0
15603774*	Oligopeptide permease ABC transporter membrane component	4	3	0	0	6
15603772	Oligopeptide transporter ATP-binding component	1	0	0	1	4
15602253*	OmpH	0	2	1	0	46
15602696	OmpH	0	0	1	0	0
15602196*	OmpW	0	5	3	1	3
15602890*	Opa	1	2	0	0	0
15603775*	OppA	6	13	9	10	34
15603773	OppC	0	0	0	1	5
15603771	OppF	0	1	0	0	6
15603167	OpsX	1	0	0	0	11
15603465	Organic solvent tolerance protein precursor	1	1	0	0	0
15602673	Ornithine carbamoyltransferase	0	0	1	0	16
15602662	Orotidine 5~-phosphate decarboxylase	1	0	0	0	21
15602222*	O-succinylbenzoic acid--CoA ligase	0	0	0	2	2
15602111	Outer membrane lipoprotein LolB precursor	1	1	0	0	19
15603287*	Oxaloacetate decarboxylase	0	2	2	1	63
15603211	OxyR	1	0	1	0	98
15603789	Pbp2	0	0	0	1	57
15602729*	PcnB	0	2	2	0	22
15602225*	Penicillin-insensitive murein endopeptidase	1	2	0	0	2
15603233*	PepD	5	5	3	0	3
15602483	PepN	0	0	0	1	32
15602319	Peptidase E	1	0	1	0	2
15602130*	Peptidase T	0	3	0	0	24
15602420	Peptide chain release factor 1	0	1	0	0	53
15602681*	Peptide chain release factor 3	2	1	0	2	0
15601922*	PfhB1	1	2	2	1	0
15601924*	PfhB2	3	4	1	4	1
15601940*	PflB	40	43	37	30	9
15603324	PgtB	0	0	1	0	0
15602015	PheA	0	1	0	1	16
15602494*	Phenylalanyl-tRNA synthetase beta subunit	0	3	0	2	3
15602023	PhnA	1	0	1	0	0
15602570*	Phosphate acetyltransferase	7	7	5	8	11
15601867	Phosphate acetyltransferase	0	0	0	1	3
15603764	Phosphatidylserine decarboxylase	0	1	0	0	12
15603407*	Phosphoenolpyruvate carboxykinase	86	77	41	36	10
15602411	Phosphoenolpyruvate carboxylase	1	0	0	0	2
15603725*	Phosphoglycerate kinase	59	60	45	44	3
15603371*	Phosphoglyceromutase	32	42	42	35	7
15603126	Phosphomethylpyrimidine kinase	0	1	1	0	3
15602004	Phospho-N-acetylmuramoyl-pentapeptide-transferase	1	1	0	1	13
15603018*	Phosphopantothenoylcysteine synthase/decarboxylase	0	3	1	2	12
15603736*	Phosphopyruvate hydratase	53	47	40	41	0
15602089	Phosphoribosylamine--glycine ligase	0	1	0	0
15601886*	Phosphoribosylaminoimidazole synthetase	0	0	0	2	2
15602950*	Phosphoribosylformylglycinamidine synthase	0	2	0	0	10
15601885	Phosphoribosylglycinamide formyltransferase	0	1	0	0	18
15602702	PhosPhoserine aminotransferase	0	0	1	1	4
15602325*	PII uridylyl-transferase	0	3	2	1	37
15602451*	Plp4	5	4	5	1	0
15603595*	PlpB	2	2	0	0	2
15603382	PlpE	0	1	0	0	2
15603383*	PlpP	3	4	3	0	0
15601968	PlsC	1	1	0	1	11
15601985*	PmbA	2	5	2	1	2
15602694*	Pmi	7	5	4	5	24
15602979*	Pnp	4	3	3	3	105
15603095*	PonA	0	2	1	1	28
15602321*	PonB	3	1	1	1	3
15603677*	Porphobilinogen deaminase	8	1	2	5	2
15602126*	PotD	3	6	6	3	16
15603249	PotD	0	1	0	0	5
15602809*	PpiB	7	2	5	1	0
15603687	PpkA	0	0	1	1	0
15602669	PqqL	1	0	1	1	9
15602134	Prc	0	1	0	0	8
15602093*	Preprotein translocase subunit YajC	0	2	0	0	18
15603002*	Primosome assembly protein PriA	0	3	0	0	32
15602545*	PrlC	1	3	0	1	7
15603235	Prolyl-tRNA synthetase	0	1	1	0	3
15602092*	Protein export protein SecD	0	1	2	1	17
15602298	PstB	1	0	0	0	12
15602926*	PtmA	3	2	5	1	7
15602698	PtnC	0	1	0	0	6
15602697	PtnD	1	1	1	0	4
15603617*	PtsG	1	0	2	0	12
15602763*	PtsH	19	13	14	19	62
15602762*	PtsI	3	3	2	1	45
15602035	PtsN	0	0	0	1	2
15603156*	Purine nucleoside phosphorylase	0	3	0	0	50
15602412	PurR	0	0	1	0	30
15602454	PutA	0	0	0	1	34
15602703*	Putative aminotransferase	4	4	1	1	6
15603531*	Putative deoxyribonucleotide triphosphate pyrophosphatase	2	2	1	1	4
15602913	Putative glutamate--cysteine ligase	1	0	0	0	0
15603030*	Putative inner membrane protein translocase component YidC	3	0	4	3	42
15603286*	Putative oxaloacetate decarboxylase subunit gamma	2	2	0	0	0
15602206*	PutP	0	2	0	0	2
15602129*	Putrescine/spermidine ABC transporter ATPase	1	3	4	2	11
15602617*	Pyridine nucleotide transhydrogenase	1	0	2	0	2
15603097*	Pyridoxine biosynthesis protein	20	25	19	25	0
15602155	Pyridoxine kinase	1	0	1	0	20
15603072*	Pyrimidine regulatory protein PyrR	0	0	2	0	8
15601960	Pyrroline-5-carboxylate reductase	0	0	0	1	8
15602518*	Pyruvate kinase	9	16	18	9	11
15602094*	Queuine tRNA-ribosyltransferase	3	1	3	0	14
15603461	Quinol dehydrogenase membrane component	0	0	1	0	109
15603460	Quinol dehydrogenase periplasmic component	0	1	0	0
15602020	RbsA	1	1	1	1	5
15603116	RbsA	0	1	0	0	3
15603242*	RbsB	0	5	4	3	26
15602018*	RbsB	2	3	2	1	12
15602017	RbsK	0	0	1	0	12
15602016	RbsR	1	1	0	0	6
15602727	Rec2	1	0	0	1	10
15603681	RecA regulator RecX	0	0	0	1	24
15602381	RecB	1	1	0	0	17
15602382	RecD	0	1	0	1	21
15602784*	RecG	2	0	2	3	35
15602057*	RecJ	2	3	0	4	14
15602197*	RecN	0	1	0	3	18
15603682*	Recombinase A	0	1	1	6	209
15601961	Recombination associated protein	0	1	0	0	7
15603730	RelA	0	0	1	0	0
15602924	Rep	1	0	0	0	29
15602277	Replicative DNA helicase	0	1	0	0	75
15603207*	RfaD	4	5	2	1	6
15602749*	RfaE	0	5	0	0	12
15603709	RfaF	0	0	1	0	7
15602614*	RibD	2	0	0	0	3
15602596*	Riboflavin synthase subunit beta	4	3	2	2	6
15603033	Ribonuclease activity regulator protein RraA	0	0	0	1	3
15602853	Ribonuclease T	1	1	1	0	6
15602582	Ribonucleotide-diphosphate reductase alpha subunit	1	1	1	1	16
15602584*	Ribonucleotide-diphosphate reductase beta subunit	0	2	2	1	16
15602019	Ribose high-affinity ABC transporter permease component	1	1	0	1	3
15603535*	Ribose-5-phosphate isomerase A	2	0	0	1	7
15602109*	Ribose-phosphate pyrophosphokinase	0	3	3	2	21
15603852*	Ribosome releasing factor	5	8	4	5	8
15602764	Ribosome-associated GTPase	0	1	1	0	6
15603484	Ribulose-phosphate 3-epimerase	1	0	1	0	1
15603106*	RNA polymerase sigma factor	2	1	1	0	63
15602771	RNA-binding protein Hfq	0	1	0	1	16
15602856*	Rne	9	11	7	5	16
15602386*	RpS9	4	5	6	5	1
15602532	RsgA	0	1	0	0	4
15602892*	S-adenosylmethionine synthetase	0	0	0	2	11
15602097	S-adenosylmethionine:tRNA ribosyltransferase-isomerase	0	0	1	0	6
15601999*	S-adenosyl-methyltransferase	0	2	0	0	21
15602776*	SapA	8	6	7	2	4
15602779	SapD	0	1	0	0	9
15602476	SbcB	1	0	0	0	7
15603712	ScrR	1	0	1	0	4
15601901	SdaA	1	1	0	0	18
15603555	Sec-independent translocase	1	0	0	0	8
15603631	SelB	1	1	1	0	0
15602655*	SelD	0	0	2	0	22
15603633	Selenocysteine synthase	0	0	1	0	14
15603536*	SerA	3	7	1	1	25
15603522*	SerB	2	0	0	0	8
15602090*	Serine hydroxymethyltransferase	1	3	1	0	14
15602123	Seryl-tRNA synthetase	1	0	0	0	2
15603584*	SfB	5	3	2	1	2
15603294	Shikimate 5-dehydrogenase	0	1	1	0	2
15603815*	Single-strand DNA-binding protein	0	0	0	2	35
15603858*	Skp	35	25	34	18	17
15603634*	SlpA	0	2	1	1	3
15603214*	SlyD	5	7	0	6	7
15601866*	SodA	43	41	18	25	130
15603817*	SodC	5	4	5	3	45
15602671*	SpeF	3	12	3	2	89
15602785*	SpoT	1	3	0	0	24
15602919*	S-ribosylhomocysteinase	5	4	1	1	31
15603705*	SrmB	1	3	1	0	11
15602387*	SspA	7	13	8	9	5
15602388	SspB	0	0	1	0	25
15602142*	SucA	3	6	1	1	38
15602143*	SucB	8	4	7	3	13
15602065*	Succinate dehydrogenase	5	8	9	5	6
15602887*	Succinyl-diaminopimelate desuccinylase	2	3	1	1	1
15602146*	SucD	0	3	0	0	7
15601969	SufI	0	1	0	0	0
15602619	Sugar fermentation stimulation protein	1	1	1	1	3
15602180*	SuhB	1	2	0	0	44
15603073*	SurA	2	2	0	0	6
15602714	TadA	1	1	0	0	0
15602712	TadC	1	0	0	0	0
15602711*	TadD	3	2	1	1	0
15602708*	TadG	2	4	3	0	0
15602241*	TbpA	6	4	3	2	18
15602521*	TehB	2	2	3	4	5
15602725*	Tetraacyldisaccharide 4~-kinase	0	1	2	0	1
15602400	Thiamine biosynthesis protein ThiI	0	1	0	0	0
15603125	Thiamine-phosphate pyrophosphorylase	0	1	0	0	1
15602594	ThiL	0	0	1	0	1
15603489*	Threonine dehydratase	2	0	0	0	21
15601980*	Threonine synthase	0	2	1	2	5
15602458*	Threonyl-tRNA synthetase	4	6	1	4	2
15603538*	Thymidylate kinase	3	1	3	3	4
15602208	TldD	0	1	0	0	72
15603285*	TnaA	1	5	3	4	53
15603053*	TonB	2	0	1	0	0
15603658*	TorA	0	9	2	0	22
15603505	TpiA	1	0	0	0	0
15602685*	Tpx	0	0	0	3	5
15603467*	Transaldolase	1	6	1	7	14
15602595	Transcription antitermination protein NusB	0	0	1	0	16
15603609*	Transcription antitermination protein NusG	3	1	1	4	33
15602625*	Transcription elongation factor NusA	1	2	1	2	18
15603785*	Transcription termination factor Rho	18	5	9	8	73
15603107*	Transketolase	7	8	4	6	5
15602896*	Translation initiation factor IF-1	1	0	2	0	14
15602624*	Translation initiation factor IF-2	3	6	3	0	21
15602467*	Translation initiation factor IF-3	1	2	2	0	5
15603084*	Translocase	2	6	5	1	153
15602832	Translocation protein TolB precursor	0	1	1	0	23
15603840*	Trigger factor	60	59	35	37	3
15603176*	Triosephosphate isomerase	9	12	13	11	2
15603428*	TrkA	0	2	0	0	7
15603668	tRNA (uracil-5-)-methyltransferase	0	0	0	1	0
15602770*	tRNA delta(2)-isopentenylpyrophosphate transferase	2	0	0	0	1
15603031	tRNA modification GTPase	0	1	1	0	7
15602190	Trp operon repressor	1	0	0	0	4
15602859*	TrxM	6	11	8	8	14
15602443*	Tryptophan synthase subunit beta	0	0	2	1	16
15602660*	TsaA	18	23	19	4	32
15602586*	TtrA	1	2	1	0	0
15602589*	TtrS	2	2	0	1	0
15603554	Twin argininte translocase protein A	0	0	1	0	2
15602529*	TyrA	0	1	0	2	3
15603566	Tyrosine recombinase	0	1	0	0	10
15602620*	Tyrosyl-tRNA synthetase	3	3	1	1	2
15602675*	TyrP	2	0	0	0	0
15603437*	Udp	4	1	2	1	12
15603859	UDP-3-O -[3-hydroxymyristoyl] glucosamine N-acyltransferase	0	1	0	0	27
15602045*	UDP-N-acetylglucosamine 1-carboxyvinyltransferase	2	0	1	1	3
15603861*	UDP-N-acetylglucosamine acyltransferase	1	5	3	1	2
15602008*	UDP-N-acetylmuramate--L-alanine ligase	3	2	2	0	3
15602005*	UDP-N-acetylmuramoyl-L-alanyl-D-glutamate synthetase	0	1	2	2	1
15601884*	Uracil phosphoribosyltransferase	1	5	0	3	6
15601930*	Uracil-DNA glycosylase	1	3	1	1	5
15602817*	Uridine kinase	0	1	0	1	18
15603851*	Uridylate kinase	2	0	0	0	2
15603599	UroD	1	0	0	0	10
15603151*	UspA	6	4	6	7	12
15602742	Uup1	0	1	0	0	1
15602276*	UvrD	0	1	1	2	41
15603819*	VacB	1	3	1	0	9
15602683*	Valyl-tRNA synthetase	2	11	1	1	1
15603591	VisC	0	1	0	0	1
15602872	WbjB	0	1	0	1	0
15602881	Wza	1	0	0	0	2
15602883	Wzs	0	1	0	1	5
15603234*	Xanthine phosphoribosyltransferase	6	3	5	3	5
15603316	XynC	0	0	1	0	17
15602335*	YagD	0	2	0	0	7
15602265*	YfeA	2	6	3	2	6
15602264	YfeB	0	0	1	0	3
15602080	YgiY	0	1	0	0	2
15602939*	YhxB	27	26	7	13	2
AMX: amoxicillin; CTC: chlortetracycline; ENR: enrofloxacin
P number of peptides
* identified with two or more peptides in any dataset
Connectivity: the number of edges/interactions for a protein
