# Supplementary material for: Effects of Subminimum Inhibitory Concentrations of Antibiotics on the Pasteurella multocida Proteome: A Systems Approach
Source: Comp Funct Genomics. 2008 Apr 22;2008:254836. doi: 10.1155/2008/254836 (PMC2367384; doi:10.1155/2008/254836)
Supplement: Supplementary file 2 [file 254836.f2.xls]

## Sheet: supplementary table 2
Supplementary Table 2. P. multocida differential protein expression in response to a quarter-MIC AMX, CTC and ENR in different GO categories
Accession	Name	∑Xcorr_Pm70	∑Xcorr_AMX	∑Xcorr_CTC	∑Xcorr_ENR	Gene name	GO category
15603879	2~,3~-cyclic nucleotide 2~-phosphodiesterase/3~-nucleotidase bifunctional periplasmic precursor protein	6.96434	35.03	ns	ns	cpdB	nucleobase, nucleoside and nucleotide interconversion
15602423	2-dehydro-3-deoxyphosphooctonate aldolase	9.24102	23.24	ns	ns	kdsA	lipopolysaccharide core region biosynthesis, K antigen biosynthesis
15602666	30S ribosomal protein S1	283.865	ns	200.99	138.3	rpsA	protein biosynthesis
15603281	30S ribosomal protein S10	102.844	ns	ns	67.08	rpsJ	protein biosynthesis
15603257	30S ribosomal protein S11	21.2618	7.87	6.61	ns	rpsK	protein biosynthesis
15603219	30S ribosomal protein S12	36.257	5.48	22.29	13.83	rpsL	protein biosynthesis
15603258	30S ribosomal protein S13	22.4924	38.32	ns	ns	rpsM	protein biosynthesis
15603267	30S ribosomal protein S14	2.0531	13.68	ns	ns	rpsN	protein biosynthesis
15602166	30S ribosomal protein S15	239.499	186.09	169.51	162.39	rpsO	protein biosynthesis
15603271	30S ribosomal protein S17	87.2563	57.72	43.71	18.87	rpsQ	protein biosynthesis
15603276	30S ribosomal protein S19	25.8523	39.09	ns	ns	rpsS	protein biosynthesis
15603849	30S ribosomal protein S2	51.9161	112.11	72.27	81.31	rpsB	protein biosynthesis
15603274	30S ribosomal protein S3	48.5923	81.12	86.91	62.22	rpsC	protein biosynthesis
15603256	30S ribosomal protein S4	20.6851	39.77	ns	ns	rpsD	protein biosynthesis
15603263	30S ribosomal protein S5	50.0999	128.26	70.96	ns	rpsE	protein biosynthesis
15603045	30S ribosomal protein S6	154.471	ns	ns	120.15	rpsF	protein biosynthesis
15603220	30S ribosomal protein S7	46.1197	65.68	76.39	82.37	rpsG	protein biosynthesis
15603266	30S ribosomal protein S8	99.9023	54.57	74.17	66.5	rpsH	translational attenuation, protein biosynthesis
15602723	3-deoxy-manno-octulosonate cytidylyltransferase	13.7801	ns	ns	0	kdsB	lipopolysaccharide core region biosynthesis, lipid A biosynthesis, K antigen biosynthesis
15602349	3-hydroxydecanoyl-ACP dehydratase	9.7388	ns	0	ns	fabA	-
15602204	3-oxoacyl-(acyl carrier protein) synthase	51.3854	ns	17.56	14.47	fabB	-
15602100	5,10-methylenetetrahydrofolate reductase	bdt	6.96	ns	ns	metF	10-formyltetrahydrofolate biosynthesis
15603607	50S ribosomal protein L1	122.762	88.44	96.32	ns	rplA	translational attenuation, protein biosynthesis
15603604	50S ribosomal protein L10	26.8425	ns	42.9	58.6	rplJ	protein biosynthesis
15603608	50S ribosomal protein L11	9.51523	ns	33.69	ns	rplK	protein biosynthesis
15602385	50S ribosomal protein L13	233.742	ns	181.67	154.56	rplM	protein biosynthesis
15603270	50S ribosomal protein L14	18.9807	7.82	4.83	8.63	rplN	protein biosynthesis
15603261	50S ribosomal protein L15	7.93537	20.24	24.81	18.54	rplO	protein biosynthesis
15603273	50S ribosomal protein L16	22.5785	ns	ns	2.11	rplP	protein biosynthesis
15603254	50S ribosomal protein L17	1.6002	31.65	9.44	8.66	rplQ	protein biosynthesis
15603264	50S ribosomal protein L18	9.32102	33.79	27.74	ns	rplR	protein biosynthesis
15603163	50S ribosomal protein L19	14.9663	28.84	7.26	2.28	rplS	protein biosynthesis
15603277	50S ribosomal protein L2	115.377	198.94	140.69	ns	rplB	protein biosynthesis
15602212	50S ribosomal protein L21	68.8453	46.64	ns	ns	rplU	protein biosynthesis
15603275	50S ribosomal protein L22	57.9444	ns	31.87	39.73	rplV	protein biosynthesis
15603278	50S ribosomal protein L23	34.7708	30.35	ns	ns	rplW	protein biosynthesis
15603269	50S ribosomal protein L24	183.408	86.65	151.41	95.28	rplX	protein biosynthesis
15603016	50S ribosomal protein L28	55.1287	ns	30.06	31.33	rpmB	protein biosynthesis
15603272	50S ribosomal protein L29	36.3217	17.83	ns	21.92	rpmC	protein biosynthesis
15603280	50S ribosomal protein L3	58.6182	71.07	ns	ns	rplC	protein biosynthesis
15603262	50S ribosomal protein L30	250.266	ns	191.4	209.88	rpmD	protein biosynthesis
15603777	50S ribosomal protein L32	61.9682	44.17	ns	35.95	rpmF	protein biosynthesis
15603015	50S ribosomal protein L33	6.79718	ns	14.85	ns	rpmG	protein biosynthesis
15603279	50S ribosomal protein L4	86.0254	ns	ns	59.57	rplD	translational attenuation, regulation of transcription, DNA-dependent, protein biosynthesis
15603265	50S ribosomal protein L6	40.6493	85.27	63.25	ns	rplF	protein biosynthesis
15603042	50S ribosomal protein L9	141.501	87.88	119.6	ns	rplI	protein biosynthesis
15603419	6-phosphogluconate dehydrogenase	11.1121	28.95	ns	ns	gnd	pentose-phosphate shunt, oxidative branch, pentose-phosphate shunt, non-oxidative branch, carbohydrate catabolism
15602760	AceE	15.6245	60.84	ns	ns	aceE	anaerobic respiration, acetyl-CoA biosynthesis from pyruvate, glyoxylate catabolism, glycolysis, carbohydrate catabolism
15602569	Acetate/propionate kinase	69.1226	96.84	ns	42.01	ackA	acetate catabolism, pyruvate catabolism, carbohydrate catabolism, amino acid catabolism
15602957	Acetyl-CoA carboxylase_accB	4.94373	ns	0	ns	accB	biotin carboxyl carrier protein biosynthesis
15602956	Acetyl-CoA carboxylase_accC	10.9731	ns	0	ns	accC	-
15602149	Adenylate kinase	2.76666	22.33	42.24	11.27	adk	purine ribonucleotide biosynthesis, nucleobase, nucleoside and nucleotide interconversion
15602803	Adenylosuccinate synthetase	2.37371	ns	11.18	19.16	purA	purine nucleotide biosynthesis, nucleobase, nucleoside and nucleotide interconversion
15603318	Adh2	187.174	249.48	123.3	144.12	adhE	fermentation
15602822	AfuC	bdt	6.12	ns	ns	afuC	-
15602968	AspA	bdt	18.47	ns	ns	aspA	amino acid metabolism, asparagine biosynthesis, lysine biosynthesis via diaminopimelate
15602848	Aspartyl-tRNA synthetase	7.1334	ns	ns	0	aspS	amino acid activation
15603357	ATP synthase subunit A	17.3181	36.69	ns	ns	atpA	ATP synthesis coupled proton transport
15603359	ATP synthase subunit B	99.7093	ns	48.76	59.7	atpD	ATP synthesis coupled proton transport
15603355	ATP synthase subunit B_atpF	8.41033	ns	1.77	0	atpF	ATP synthesis coupled proton transport
15603356	ATP synthase subunit D	27.2428	ns	10.73	6.47	atpH	ATP synthesis coupled proton transport
15603614	ATP-dependent protease peptidase subunit	8.55944	17.93	ns	ns	hslV	proteolysis and peptidolysis, protein folding
15601978	Bifunctional aspartokinase I/homeserine dehydrogenase I	7.10989	ns	0	ns	thrA	threonine biosynthesis, methionine biosynthesis, homoserine biosynthesis
15603671	GlmU	8.50721	20.2	ns	ns	glmU	peptidoglycan biosynthesis, nucleotide-sugar biosynthesis, enterobacterial common antigen biosynthesis, amine catabolism, O antigen biosynthesis
15602431	Branched-chain amino acid aminotransferase	1.62496	7.18	ns	ns	ilvE	leucine biosynthesis, alanine biosynthesis
15603153	Carbon storage regulator	5.41988	0	ns	0	csrA	translational attenuation, taxis, glycolysis, gluconeogenesis, RNA catabolism, carbohydrate catabolism
15602012	Cell division protein FtsZ	11.4609	22.14	ns	ns	ftsZ	-
15602972	Chaperonin GroEL	148.567	246.76	ns	177.14	groEL	protein folding
15602224	Chorismate synthase	4.15068	ns	ns	14.85	aroC	chorismate biosynthesis
15603569	ClpB	30.345	ns	13.16	ns	clpB	protein folding
15602971	Co-chaperonin GroES	22.9977	42.72	56.25	56.64	groES	protein folding
15602474	Condesin subunit B	bdt	11.1	ns	ns	mukB	-
15603558	CysK	36.506	51.72	56.96	ns	cysK	cysteine biosynthesis
15602523	DapD	5.9476	17.21	ns	ns	dapD	lysine biosynthesis via diaminopimelate
15602977	DeaD	4.71198	ns	13.26	ns	deaD	RNA modification
15603209	DeoR	bdt	10.64	ns	ns	deoR	transcription, nucleobase, nucleoside and nucleotide interconversion
15603596	D-fructose-6-phosphate amidotransferase	bdt	31.27	12.41	6.75	glmS	peptidoglycan biosynthesis, amino sugar biosynthesis, O antigen biosynthesis
15602591	Dihydrodipicolinate reductase	12.0602	ns	4.1	2.65	dapB	lysine biosynthesis via diaminopimelate
15602916	Dihydrodipicolinate synthase	bdt	ns	ns	15.31	dapA	lysine biosynthesis via diaminopimelate
15602759	Dihydrolipoamide acetyltransferase	35.6998	17.22	ns	14.08	aceF	acetyl-CoA biosynthesis from pyruvate, glyoxylate catabolism, glycolysis, anaerobic respiration, carbohydrate catabolism
15602758	Dihydrolipoamide dehydrogenase	59.2098	92.51	43.45	29.82	lpdA	aerobic respiration, amino acid catabolism, carbohydrate catabolism, glyoxylate catabolism, acetyl-CoA biosynthesis from pyruvate, anaerobic respiration, tricarboxylic acid cycle, glycolysis, 10-formyltetrahydrofolate biosynthesis
15603341	DNA gyrase subunit B	5.86472	23.01	ns	ns	gyrB	transcription, DNA dependent DNA replication
15602769	DNA mismatch repair protein	50.7922	40.76	37.57	28.63	mutL	DNA repair
15602930	DNA polymerase I	2.87054	14.5	ns	ns	polA	DNA dependent DNA replication
15601899	DNA polymerase III subunit alpha	9.29571	ns	ns	2.26	dnaE	DNA dependent DNA replication
15603255	DNA-directed RNA polymerase alpha subunit	32.8059	76.1	51.9	ns	rpoA	transcription
15603602	DNA-directed RNA polymerase beta subunit	17.0477	34.49	ns	ns	rpoB	transcription
15603601	DNA-directed RNA polymerase beta~ subunit	56.1597	85.22	ns	ns	rpoC	transcription
15602786	DNA-directed RNA polymerase omega subunit	bdt	10.97	ns	9.63	rpoZ	transcription
15602601	DnaK	97.5636	132.73	ns	72.55	dnaK	response to osmotic stress, protein folding
15603221	Elongation factor EF-2	182.235	136.89	ns	146.36	fusA	protein biosynthesis
15603850	Elongation factor Ts	167.405	194.06	99.49	82.76	tsf	protein biosynthesis
15603222	Elongation factor Tu	875.729	ns	936.01	ns	tuf	response to osmotic stress, protein biosynthesis
15602047	FabI	42.801	30.33	34.21	28.19	fabI	-
15601993	FecE	2.21089	9.22	ns	ns	fecE	iron ion transport
15603290	Frataxin-like protein	bdt	ns	10.74	7.36	cyaY	-
15603726	Fructose-bisphosphate aldolase	504.937	566.63	450.07	436.84	fbaA	carbohydrate catabolism
15602303	FtsH	21.8955	7.85	4.65	3.9	hflB	-
15603384	FtsY	bdt	8.18	ns	ns	ftsY	-
15602688	Fumarate hydratase	42.1583	80.49	19.05	ns	fumC	tricarboxylic acid cycle, fermentation, anaerobic respiration
15602066	Fumarate reductase	56.0916	ns	ns	10.88	frdA	fermentation, anaerobic respiration
15602063	Fumarate reductase subunit D	bdt	6.57	ns	ns	frdD	fermentation, anaerobic respiration
15603154	GalU	3.70382	18.66	ns	ns	galU	response to dessication, glucose metabolism, carbohydrate catabolism, colanic acid biosynthesis, galactose metabolism
15603761	Gamma-glutamyl kinase	bdt	9.05	ns	ns	proB	proline biosynthesis
15603309	GlpQ	4.63568	15.47	ns	ns	glpQ	glycerol metabolism
15603308	GlpT	bdt	12.85	ns	ns	glpT	glycerol metabolism, anaerobic respiration, aerobic respiration
15602141	GltA	19.6109	ns	ns	8.26	gltA	tricarboxylic acid cycle, anaerobic respiration
15602761	Glucose-specific PTS system enzyme IIA component	55.0535	28.92	28.48	16.33	crr	carbohydrate catabolism
15602393	Glutaminyl-tRNA synthetase	bdt	8	ns	ns	glnS	amino acid activation
15602980	Glutamyl-tRNA synthetase	16.4832	25.52	ns	ns	gltX	amino acid activation
15602789	Glyceraldehyde-3-phosphate dehydrogenase	253.576	ns	125.53	70.1	gapA	pyridoxine biosynthesis, glycolysis, gluconeogenesis
15602967	Glycyl-tRNA synthetase beta subunit	15.6634	ns	0	ns	glyS	amino acid activation
15602658	GntP_gntP_1	18.6989	ns	9.94	7.51	yjhF	-
15602199	GrpE	15.8001	ns	5.91	4.81	grpE	protein folding
15602457	HbpA	5.90461	17.5	ns	23.18	sapA	amino acid catabolism
15602889	Heat shock protein 90	42.512	ns	5.62	18.46	htpG	protein folding
15602493	HimA	7.54477	8.3	0	0	himA	DNA recombination
15601897	HktE	26.1002	ns	2.98	6.08	katE	xenobiotic metabolism
15603402	HsdM	bdt	7.03	ns	ns	slr6095	-
15603597	HupA	54.3135	ns	36.12	ns	hupA	-
15601882	Hypothetical protein PM0017	6.47835	ns	0	0	hda	DNA dependent DNA replication
15601929	Hypothetical protein PM0064	69.1545	ns	ns	41.22	yfiD	anaerobic respiration
15601938	Hypothetical protein PM0073	71.2822	45.67	26.93	43.01	ycfF	protein biosynthesis
15601957	Hypothetical protein PM0092	60.4523	ns	ns	24.31	yfiA	protein biosynthesis
15602024	Hypothetical protein PM0159	30.4637	ns	26.39	16.24	ytfJ	-
15602051	Hypothetical protein PM0186	bdt	7.02	ns	ns	ybaX	xenobiotic metabolism
15602098	Hypothetical protein PM0233	bdt	ns	ns	9.25	yegQ	-
15602223	Hypothetical protein PM0358	7.67467	ns	0	0	kefA	-
15602260	Hypothetical protein PM0395	bdt	9.63	ns	ns	yccT	-
15602309	Hypothetical protein PM0444	4.60755	ns	21.91	36.59	ycgL	-
15602384	Hypothetical protein PM0519	4.73055	12.02	ns	ns	yegP	-
15602524	Hypothetical protein PM0659	4.08846	ns	14.73	ns	yfhM	-
15602535	Hypothetical protein PM0670	10.1036	ns	ns	0	cybC	cytochrome biogenesis
15602540	Hypothetical protein PM0675	9.6488	19.14	ns	ns	ycfX	regulation of transcription, DNA-dependent
15602556	Hypothetical protein PM0691	9.98731	ns	ns	0	xthA	response to radiation, DNA catabolism
15602651	Hypothetical protein PM0786	262.765	ns	172.47	75.98	ompA	-
15602652	Hypothetical protein PM0787	7.67631	ns	0	0	ydiJ	-
15602668	Hypothetical protein PM0803	bdt	12.7	ns	ns	yddB	-
15602682	Hypothetical protein PM0817	9.24107	ns	0	ns	dps	response to starvation
15602699	Hypothetical protein PM0834	65.0462	ns	41.99	33.87	manX	carbohydrate catabolism
15602831	Hypothetical protein PM0966	8.81012	27.68	ns	ns	pal	-
15602845	Hypothetical protein PM0980	7.65152	ns	0	ns	PM0980	-
15603138	Hypothetical protein PM1273	6.64927	ns	0	0	ydeW	-
15603143	Hypothetical protein PM1278	4.66808	11.53	ns	ns	yneB	-
15603144	Hypothetical protein PM1279	20.1024	ns	4.43	8.57	yneC	-
15603181	Hypothetical protein PM1316	17.9867	ns	ns	2.51	yggL	-
15603189	Hypothetical protein PM1324	25.2803	ns	7.02	0	bolA	response to osmotic stress
15603232	Hypothetical protein PM1367	bdt	ns	ns	7.74	ygbI	transcription
15603348	Hypothetical protein PM1483	38.2386	ns	17.5	ns	yiiU	-
15603479	Hypothetical protein PM1614	17.8791	2.12	ns	0	nlpD	-
15603521	Hypothetical protein PM1656	bdt	9.04	ns	ns	yajQ	-
15603572	Hypothetical protein PM1707	28.7505	9.09	14.32	12.87	yjhT	-
15603592	Hypothetical protein PM1727	5.51888	ns	ns	14.12	gmhB	-
15603665	Hypothetical protein PM1800	bdt	ns	5.21	ns	yihD	-
15603718	Hypothetical protein PM1853	15.5768	6.81	2.3	ns	ykgE	-
15603720	Hypothetical protein PM1855	7.08569	ns	ns	0	ykgG	-
15603056	Inorganic pyrophosphatase	14.9791	ns	7.34	ns	ppa	phosphorus metabolism
15603527	Isoleucyl-tRNA synthetase	39.9241	ns	19.33	ns	ileS	amino acid activation
15602211	IspB	15.0765	11.8	ns	ns	ispB	-
15603862	Lipid-A-disaccharide synthase	bdt	12.14	ns	ns	lpxB	lipid A biosynthesis
15602419	Lpp	7.20513	ns	18.73	ns	slyB	-
15602119	Lrp	8.74769	ns	25.09	ns	lrp	transcription, leucine biosynthesis
15602054	Lysyl-tRNA synthetase	bdt	15.68	ns	ns	lysS	amino acid activation
15602415	Malate dehydrogenase	33.4252	53.37	ns	ns	mdh	tricarboxylic acid cycle, glyoxylate catabolism, gluconeogenesis, fermentation, anaerobic respiration, carbohydrate catabolism
15602168	Methionyl-tRNA synthetase	2.43078	ns	11.53	ns	metG	amino acid activation
15602520	MsmB	86.6276	ns	50.62	4.38	cspC	response to temperature, transcription
15602548	NagC	14.3995	ns	5.3	4.96	nagC	amino sugar biosynthesis, transcription, translational attenuation
15603459	NapA	30.982	ns	2.67	17.83	napA	anaerobic respiration
15601889	NrfB	17.2635	ns	ns	2.57	nrfB	anaerobic respiration, cytochrome biogenesis
15603774	Oligopeptide permease ABC transporter membrane component	11.8816	ns	0	0	oppB	peptidoglycan metabolism
15602196	OmpW	bdt	18.94	9.04	ns	yciD	-
15603775	OppA	20.0141	38.93	ns	ns	oppA	protein folding, peptidoglycan metabolism
15603233	PepD	14.3589	ns	ns	0	pepD	-
15602130	Peptidase T	bdt	7.86	ns	ns	pepT	-
15601940	PflB	135.691	ns	ns	104.7	pflB	anaerobic respiration, amino acid catabolism
15602494	Phenylalanyl-tRNA synthetase beta subunit	bdt	10.09	ns	ns	pheT	amino acid activation
15603407	Phosphoenolpyruvate carboxykinase	264.244	ns	119.99	112.87	pckA	gluconeogenesis
15603725	Phosphoglycerate kinase	218.117	ns	170.21	161.01	pgk	glycolysis, gluconeogenesis
15603371	Phosphoglyceromutase	98.2875	124.89	130.31	ns	gpmA	glycolysis, gluconeogenesis
15603018	Phosphopantothenoylcysteine synthase/decarboxylase	bdt	4.88	ns	ns	dfp	DNA dependent DNA replication, coenzyme A biosynthesis
15602325	PII uridylyl-transferase	bdt	5.09	ns	ns	glnD	glutamine biosynthesis, nitrogen metabolism, protein modification
15603677	Porphobilinogen deaminase	18.2232	2.52	4.92	ns	hemC	-
15602126	PotD	8.27753	18.31	17.33	ns	potD	amine catabolism, polyamine biosynthesis
15602809	PpiB	23.6458	5.08	13.08	4.46	ppiB	protein folding
15603002	Primosome assembly protein PriA	bdt	9.03	ns	ns	priA	DNA dependent DNA replication
15602763	PtsH	56.0983	35.22	ns	ns	ptsH	carbohydrate catabolism
15603156	Purine nucleoside phosphorylase	bdt	9.84	ns	ns	deoD	nucleobase, nucleoside and nucleotide interconversion
15602703	Putative aminotransferase	11.8749	ns	2.15	ns	yfdZ	-
15603030	Putative inner membrane protein translocase component YidC	8.8556	0	ns	ns	yidC	-
15602129	Putrescine/spermidine ABC transporter ATPase	2.40868	ns	10.91	ns	potA	polyamine biosynthesis, amine catabolism
15602518	Pyruvate kinase	28.5626	51.43	54.94	ns	pykA	glycolysis, fermentation, anaerobic respiration
15602094	Queuine tRNA-ribosyltransferase	8.19378	ns	ns	0	tgt	RNA modification
15603242	RbsB	bdt	14.77	0	9.61	xylF	carbohydrate catabolism
15602018	RbsB_rbsB_1	4.21755	ns	0	ns	rbsB	carbohydrate catabolism
15602197	RecN	bdt	ns	ns	14.98	recN	SOS response, DNA repair, DNA recombination
15603682	Recombinase A	bdt	ns	ns	19.48	recA	proteolysis and peptidolysis, SOS response, DNA repair, DNA recombination
15603207	RfaD	9.3569	ns	ns	2.13	rfaD	nicotinamide adenine dinucleotide biosynthesis
15602749	RfaE	bdt	12.94	ns	ns	rfaE	carbohydrate catabolism, lipopolysaccharide core region biosynthesis
15602109	Ribose-phosphate pyrophosphokinase	bdt	9.17	8.4	ns	prsA	purine ribonucleotide biosynthesis
15602856	Rne	37.0554	ns	ns	13.7	rne	RNA catabolism
15602776	SapA	20.6598	ns	ns	5.45	yliB	-
15603536	SerA	6.84385	17.49	ns	ns	serA	L-serine biosynthesis
15603584	SfB	14.7422	ns	ns	2.25	rluD	RNA modification
15603858	Skp	119.749	81.64	ns	61.22	hlpA	protein folding
15603214	SlyD	14.9759	ns	0	ns	fkpA	protein folding
15601866	SodA	153.537	ns	66.01	85.36	sodA	xenobiotic metabolism
15602671	SpeF	9.82968	40.56	ns	ns	speF	polyamine biosynthesis
15602919	S-ribosylhomocysteinase	18.6905	ns	2.74	3.02	ygaG	-
15602387	SspA	20.9721	36.33	ns	ns	sspA	transcription, response to starvation, regulation of transcription, DNA-dependent
15602143	SucB	27.2434	ns	ns	9.56	sucB	tricarboxylic acid cycle
15602065	Succinate dehydrogenase	11.408	21.6	21.19	ns	frdB	fermentation, anaerobic respiration
15602146	SucD	bdt	7.79	ns	ns	sucD	tricarboxylic acid cycle
15602458	Threonyl-tRNA synthetase	8.66086	18.93	ns	ns	thrS	amino acid activation
15603285	TnaA	2.50155	13.43	ns	9.66	tnaA	amino acid catabolism
15603658	TorA	bdt	25.35	ns	ns	torA	anaerobic respiration
15602685	Tpx	bdt	ns	ns	6.88	tpx	xenobiotic metabolism
15603785	Transcription termination factor Rho	42.4161	ns	20.5	ns	rhlE	RNA modification
15603785	Transcription termination factor Rho	42.4161	15.9	20.5	21.29	rho	transcription
15603107	Transketolase	27.1775	ns	13.33	ns	tktB	carbohydrate catabolism, nucleobase, nucleoside and nucleotide interconversion, pentose-phosphate shunt, non-oxidative branch
15602624	Translation initiation factor IF-2	7.43503	23.75	ns	0	infB	protein biosynthesis
15603084	Translocase	5.70252	14.75	14.91	ns	secA	-
15603840	Trigger factor	200.504	ns	110.73	117.27	tig	protein folding
15602660	TsaA	58.571	76.61	ns	13.14	ahpC	xenobiotic metabolism
15602620	Tyrosyl-tRNA synthetase	8.44817	ns	2.12	ns	tyrS	amino acid activation
15603437	Udp	10.6869	2.93	ns	2.8	udp	nucleobase, nucleoside and nucleotide interconversion
15603861	UDP-N-acetylglucosamine acyltransferase	2.38605	12.79	ns	ns	lpxA	lipid A biosynthesis
15602008	UDP-N-acetylmuramate--L-alanine ligase	9.28963	ns	ns	0	murC	peptidoglycan biosynthesis
15601884	Uracil phosphoribosyltransferase	2.7287	13.46	ns	ns	upp	nucleobase, nucleoside and nucleotide interconversion
15602683	Valyl-tRNA synthetase	6.88901	29.11	ns	ns	valS	amino acid activation
15602939	YhxB	81.1934	ns	18.58	38.6	pgm	carbohydrate catabolism, glucose metabolism
AMX: amoxicillin; CTC: chlortetracycline; ENR: enrofloxacin
Pm70: P. multocida cultured in the absence of sub-MICs
bdt: below detectable threshold
ns: expression not significant compared to Pm70
